# Supplementary material for: Primary Cilia Are Lost in Preinvasive and Invasive Prostate Cancer
Source: PubMed Central journal article supplement (PMC3699526; doi:10.1371/journal.pone.0068521), 2013-07-02
Supplement: pone.0068521.s007.pdf [file pone.0068521.s007.pdf]

**Table S1A: Values for quantitation of percent ciliated epithelial/cancer cells in normal, PIN, cancer, and perineural.**

| <b>Boxplot all epithelial/cancer cells</b> |              |                |                  |                      |                     |                         |
|--------------------------------------------|--------------|----------------|------------------|----------------------|---------------------|-------------------------|
|                                            | n (patients) | % cilia median | n (total nuclei) | Range nuclei/patient | Range cilia/patient | P-value                 |
| Normal                                     | 10           | 8.9            | 6517             | 405-1097             | 25-95               | n/a                     |
| PIN                                        | 24           | 5.7            | 22951            | 325-1759             | 8-172               | 0.24                    |
| PIN LG                                     | 13           | 6.6            | 9652             | 325-1698             | 17-172              | n/a                     |
| PIN HG                                     | 18           | 5.8            | 13299            | 378-1759             | 8-102               | n/a                     |
| Ca                                         | 75           | 1.9            | 52877            | 112-1923             | 0-69                | <b>&lt;0.0001</b>       |
| Ca LG                                      | 35           | 2.2            | 18973            | 208-1273             | 1-49                | n/a                     |
| Ca HG                                      | 40           | 1.4            | 33904            | 112-1923             | 0-69                | n/a                     |
| Peri                                       | 18           | 1.7            | 8082             | 120-1393             | 0-72                | <b>&lt;0.0001</b>       |
| Average                                    | 29           | 4.3            | 20782            | 248-1603             | 7-100               | trend <b>&lt;0.0001</b> |

**Table S1B: Values for analysis of percent ciliated epithelial/cancer cells in normal, PIN, cancer, and perineural.**

| <b>Bar graph all epithelial/cancer cells</b> |                |                 |                 |                 |
|----------------------------------------------|----------------|-----------------|-----------------|-----------------|
|                                              | Q1 n(patients) | Q1 % (patients) | Q4 n (patients) | Q4 % (patients) |
| Normal                                       | 2              | 20              | 2               | 20              |
| PIN                                          | 17             | 70.8            | 3               | 12.5            |
| PIN LG                                       | 8              | 61.5            | 2               | 15.4            |
| PIN HG                                       | 14             | 77.8            | 2               | 11.1            |
| Ca                                           | 74             | 98.7            | 0               | 0               |
| Ca LG                                        | 35             | 100             | 0               | 0               |
| Ca HG                                        | 39             | 97.5            | 0               | 0               |
| Peri                                         | 17             | 94.4            | 1               | 5.6             |
| Q1 ≤ 7.6%, Q4 >11.4%                         |                |                 |                 |                 |
