# Supplementary material for: Primary Cilia Are Lost in Preinvasive and Invasive Prostate Cancer
Source: PubMed Central journal article supplement (PMC3699526; doi:10.1371/journal.pone.0068521), 2013-07-02
Supplement: pone.0068521.s008.pdf [file pone.0068521.s008.pdf]

**Table S2A: Values for quantitation of percent ciliated CK5+ and CK5- epithelial/cancer cells in normal, PIN, cancer, and perineural.**

| <b>Boxplot CK5+ epithelial/cancer cells</b> |              |                |                  |                      |                     |                         |
|---------------------------------------------|--------------|----------------|------------------|----------------------|---------------------|-------------------------|
|                                             | n (patients) | % cilia median | n (total nuclei) | Range nuclei/patient | Range cilia/patient | P-value                 |
| Normal                                      | 10           | 28.8           | 1624             | 58-418               | 20-85               | n/a                     |
| PIN                                         | 24           | 25.2           | 2968             | 37-406               | 6-102               | 0.14                    |
| PIN LG                                      | 13           | 25.6           | 1448             | 20-319               | 12-100              | n/a                     |
| PIN HG                                      | 18           | 25.6           | 1538             | 36-297               | 6-75                | n/a                     |
| Ca                                          | 35           | 8.1            | 853              | 1-160                | 0-40                | <b>&lt;0.0001</b>       |
| Ca LG                                       | 13           | 0              | 161              | 1-39                 | 0-11                | n/a                     |
| Ca HG                                       | 22           | 11.8           | 692              | 1-160                | 0-40                | n/a                     |
| Peri                                        | 6            | 0              | 104              | 1-55                 | 0                   | <b>&lt;0.0001</b>       |
| Average                                     | 18           | 15.6           | 1174             | 19-232               | 6-65                | trend <b>&lt;0.0001</b> |
| <b>Boxplot CK5- epithelial/cancer cells</b> |              |                |                  |                      |                     |                         |
| Normal                                      | 10           | 2.9            | 4893             | 270-726              | 3-33                | n/a                     |
| PIN                                         | 24           | 2.5            | 16438            | 250-1527             | 0-70                | 0.4                     |
| PIN LG                                      | 13           | 2.7            | 6864             | 250-1386             | 5-62                | n/a                     |
| PIN HG                                      | 18           | 2.0            | 9574             | 229-1462             | 0-30                | n/a                     |
| Ca                                          | 75           | 1.7            | 52024            | 112-1874             | 0-59                | <b>0.02</b>             |
| Ca LG                                       | 35           | 1.9            | 18812            | 207-1273             | 1-49                | n/a                     |
| Ca HG                                       | 40           | 1.3            | 33212            | 112-1874             | 0-59                | n/a                     |
| Peri                                        | 18           | 1.7            | 7978             | 120-1338             | 0-72                | 0.116                   |
| Average                                     | 29           | 2.1            | 18724            | 194-1433             | 1-54                | trend= <b>0.049</b>     |

**Table S2B: Values for analysis of percent ciliated CK5+ and CK5- epithelial/cancer cells in normal, PIN, cancer, and perineural.**

| <b>Bar graph CK5+ epithelial/cancer cells</b> |                |                 |                 |                 |
|-----------------------------------------------|----------------|-----------------|-----------------|-----------------|
|                                               | Q1 n(patients) | Q1 % (patients) | Q4 n (patients) | Q4 % (patients) |
| Normal                                        | 2              | 20              | 2               | 20              |
| PIN                                           | 15             | 62.5            | 3               | 12.5            |
| PIN LG                                        | 7              | 53.9            | 2               | 15.4            |
| PIN HG                                        | 11             | 61.1            | 3               | 16.7            |
| Ca                                            | 29             | 82.9            | 2               | 5.7             |
| Ca LG                                         | 11             | 84.6            | 1               | 7.7             |
| Ca HG                                         | 18             | 81.8            | 1               | 4.5             |
| Peri                                          | 6              | 100             | 0               | 0               |
| Q1 ≤26.9%, Q4>33.6%                           |                |                 |                 |                 |
| <b>Bar graph CK5- epithelial/cancer cells</b> |                |                 |                 |                 |
| Normal                                        | 2              | 20              | 2               | 20              |
| PIN                                           | 8              | 33.3            | 5               | 20.8            |
| PIN LG                                        | 3              | 23.1            | 2               | 15.3            |
| PIN HG                                        | 7              | 38.9            | 4               | 22.2            |
| Ca                                            | 36             | 48              | 7               | 9.3             |
| Ca LG                                         | 15             | 42.9            | 3               | 8.6             |
| Ca HG                                         | 21             | 52.5            | 4               | 10              |
| Peri                                          | 8              | 44.4            | 3               | 16.7            |
| Q1 ≤1.5%, Q4>4.2%                             |                |                 |                 |                 |
