# Supplementary material for: Primary Cilia Are Lost in Preinvasive and Invasive Prostate Cancer
Source: PubMed Central journal article supplement (PMC3699526; doi:10.1371/journal.pone.0068521), 2013-07-02
Supplement: pone.0068521.s009.pdf [file pone.0068521.s009.pdf]

**Table S3A: Values for quantitation of percent ciliated stromal cells in normal, PIN, cancer, and perineural.**

| <b>Boxplot Stromal cells</b> |              |                |                  |                      |                     |            |
|------------------------------|--------------|----------------|------------------|----------------------|---------------------|------------|
|                              | n (patients) | % cilia median | n (total nuclei) | Range nuclei/patient | Range cilia/patient | P-value    |
| Normal                       | 10           | 5.9            | 2625             | 170-424              | 3-52                | n/a        |
| PIN                          | 24           | 5.8            | 6332             | 49-509               | 1-46                | 0.71       |
| PIN LG                       | 13           | 7.9            | 2686             | 26-509               | 0-46                | n/a        |
| PIN HG                       | 18           | 4.4            | 3646             | 46-458               | 1-36                | n/a        |
| Ca                           | 75           | 5.2            | 24177            | 28-918               | 0-76                | 0.21       |
| Ca LG                        | 35           | 6.2            | 8175             | 51-761               | 0-76                | n/a        |
| Ca HG                        | 40           | 4.5            | 16002            | 28-918               | 0-70                | n/a        |
| Peri                         | 18           | 5.0            | 5555             | 136-809              | 0-45                | 0.6        |
| Average                      | 29           | 5.6            | 8650             | 67-663               | 1-56                | trend=0.32 |

**Table S3B: Values for analysis of percent ciliated stromal cells in normal, PIN, cancer and perineural.**

| <b>Bar graph Stromal cells</b> |                |                 |                 |                 |
|--------------------------------|----------------|-----------------|-----------------|-----------------|
|                                | Q1 n(patients) | Q1 % (patients) | Q4 n (patients) | Q4 % (patients) |
| Normal                         | 2              | 20              | 2               | 20              |
| PIN                            | 9              | 37.5            | 4               | 16.7            |
| PIN LG                         | 3              | 23.1            | 4               | 30.8            |
| PIN HG                         | 8              | 44.4            | 2               | 11.1            |
| Ca                             | 32             | 42.7            | 13              | 17.3            |
| Ca LG                          | 13             | 37.1            | 7               | 20              |
| Ca HG                          | 19             | 47.5            | 6               | 15              |
| Peri                           | 8              | 44.4            | 6               | 33.3            |
| Q1 ≤4.2%, Q4 >8.9%             |                |                 |                 |                 |
