# Supplementary material for: Primary Cilia Are Lost in Preinvasive and Invasive Prostate Cancer
Source: PubMed Central journal article supplement (PMC3699526; doi:10.1371/journal.pone.0068521), 2013-07-02
Supplement: pone.0068521.s010.pdf [file pone.0068521.s010.pdf]

**Table S4A: Values for quantitation of cilia lengths in normal, PIN, cancer and perineural.**

| <b>Boxplot all epithelial/cancer cells</b> |                         |                    |                 |                                 |                                |                               |
|--------------------------------------------|-------------------------|--------------------|-----------------|---------------------------------|--------------------------------|-------------------------------|
|                                            | n (patients with cilia) | n (total patients) | n (total cilia) | Median median cilia length (µm) | Range median cilia length (µm) | P-value                       |
| Normal                                     | 10                      | 10                 | 592             | 1.30                            | 1.19-1.78                      | n/a                           |
| PIN                                        | 24                      | 24                 | 1385            | 1.22                            | 0.73-1.63                      | 0.15                          |
| PIN LG                                     | 13                      | 13                 | 679             | 1.32                            | 0.75-1.63                      | 0.74 <sup>a</sup>             |
| PIN HG                                     | 18                      | 18                 | 706             | 1.21                            | 0.73-1.55                      | <b>0.005<sup>a</sup></b>      |
| Ca                                         | 74                      | 75                 | 1166            | 1.0                             | 0.34-2.09                      | <b>&lt;0.0001</b>             |
| Ca LG                                      | 35                      | 35                 | 431             | 0.86                            | 0.34-2.09                      | <b>&lt;0.0001<sup>a</sup></b> |
| Ca HG                                      | 39                      | 40                 | 735             | 1.06                            | 0.58-1.7                       | 0.15 <sup>a</sup>             |
| Peri                                       | 14                      | 18                 | 247             | 0.76                            | 0.46-1.74                      | <b>&lt;0.0001</b>             |
| Average                                    | 29                      | 29                 | 730             | 1.09                            | 0.64-1.78                      | trend <b>&lt;0.0001</b>       |
| <b>Boxplot CK5+ cells</b>                  |                         |                    |                 |                                 |                                |                               |
| Normal                                     | 10                      | 10                 | 445             | 1.38                            | 0.77-1.75                      | n/a                           |
| PIN                                        | 24                      | 24                 | 911             | 1.38                            | 0.51-2.27                      | 0.615                         |
| PIN LG                                     | 9                       | 13                 | 395             | 1.36                            | 1.02-1.67                      | 0.89 <sup>a</sup>             |
| PIN HG                                     | 15                      | 18                 | 377             | 1.39                            | 0.51-2.27                      | 0.41 <sup>a</sup>             |
| Ca                                         | 22                      | 75                 | 154             | 1.31                            | 0.59-4.21                      | 0.77                          |
| Ca LG                                      | 5                       | 35                 | 25              | 0.93                            | 0.85-1.34                      | <b>&lt;0.0001<sup>a</sup></b> |
| Ca HG                                      | 17                      | 40                 | 129             | 1.36                            | 0.59-4.21                      | 0.34 <sup>a</sup>             |
| Peri                                       | 0                       | 18                 | 0               | n/a                             | n/a                            | n/a                           |
| Average                                    | 11                      | 29                 | 287             | 1.3                             | 0.69-2.53                      | trend=0.998                   |
| <b>Boxplot CK5- cells</b>                  |                         |                    |                 |                                 |                                |                               |
| Normal                                     | 10                      | 10                 | 147             | 1.2                             | 0.69-2.1                       | n/a                           |
| PIN                                        | 24                      | 24                 | 474             | 0.85                            | 0.42-1.73                      | <b>0.049</b>                  |
| PIN LG                                     | 9                       | 13                 | 211             | 1.04                            | 0.71-1.54                      | 0.99 <sup>a</sup>             |
| PIN HG                                     | 15                      | 18                 | 191             | 0.73                            | 0.42-1.73                      | <b>&lt;0.0001<sup>a</sup></b> |
| Ca                                         | 74                      | 75                 | 1012            | 0.93                            | 0.34-2.09                      | 0.093                         |
| Ca LG                                      | 35                      | 35                 | 406             | 0.82                            | 0.34-2.09                      | <b>&lt;0.0001<sup>a</sup></b> |
| Ca HG                                      | 39                      | 40                 | 606             | 1.01                            | 0.58-1.7                       | 0.997 <sup>a</sup>            |
| Peri                                       | 14                      | 18                 | 247             | 0.76                            | 0.40-1.74                      | <b>0.001</b>                  |
| Average                                    | 28                      | 29                 | 403             | 0.92                            | 0.49-1.84                      | trend= <b>0.047</b>           |
| <b>Boxplot stromal cells</b>               |                         |                    |                 |                                 |                                |                               |
|                                            | n (patients with cilia) | n (total patients) | n (total cilia) | Median median cilia length (µm) | Range median cilia length (µm) | P-value                       |
| Normal                                     | 10                      | 10                 | 178             | 1.16                            | 0.71-1.66                      | n/a                           |
| PIN                                        | 24                      | 24                 | 377             | 0.93                            | 0.51-1.79                      | 0.41                          |
| PIN LG                                     | 9                       | 13                 | 196             | 1.04                            | 0.81-1.79                      | 0.85 <sup>a</sup>             |
| PIN HG                                     | 15                      | 18                 | 181             | 0.89                            | 0.51-1.58                      | 0.16 <sup>a</sup>             |
| Ca                                         | 70                      | 75                 | 1316            | 0.99                            | 0.33-1.73                      | 0.72                          |
| Ca LG                                      | 33                      | 35                 | 506             | 1.01                            | 0.33-1.69                      | 0.79 <sup>a</sup>             |
| Ca HG                                      | 37                      | 40                 | 810             | 0.98                            | 0.68-1.73                      | 0.69 <sup>a</sup>             |
| Peri                                       | 17                      | 18                 | 343             | 0.86                            | 0.47-1.53                      | 0.25                          |
| Average                                    | 27                      | 29                 | 487             | 0.98                            | 0.54-1.69                      | trend=0.43                    |

a- A separate linear regression analysis was performed on data for separated grades of PIN and Ca

**Table S4B: Values for analysis of cilia lengths in normal, PIN, cancer and perineural.**

| <b>Bar graph all epithelial/cancer cells</b> |                    |                    |                    |                    |
|----------------------------------------------|--------------------|--------------------|--------------------|--------------------|
|                                              | Q1 n<br>(patients) | Q1 %<br>(patients) | Q4 n<br>(patients) | Q4 %<br>(patients) |
| Normal                                       | 2                  | 20                 | 2                  | 20                 |
| PIN                                          | 15                 | 48.4               | 0                  | 0                  |
| PIN LG                                       | 5                  | 38.5               | 0                  | 0                  |
| PIN HG                                       | 10                 | 55.6               | 0                  | 0                  |
| Ca                                           | 52                 | 70.3               | 2                  | 2.7                |
| Ca LG                                        | 29                 | 82.9               | 1                  | 2.9                |
| Ca HG                                        | 23                 | 59.0               | 1                  | 2.6                |
| Peri                                         | 11                 | 78.6               | 1                  | 7.1                |
| Q1 ≤1.23 μm, Q4>1.7 μm                       |                    |                    |                    |                    |
| <b>Bar graph CK5+ cells</b>                  |                    |                    |                    |                    |
| Normal                                       | 2                  | 20                 | 2                  | 20                 |
| PIN                                          | 9                  | 37.5               | 8                  | 33.3               |
| PIN LG                                       | 3                  | 33.3               | 3                  | 33.3               |
| PIN HG                                       | 6                  | 40                 | 5                  | 33.3               |
| Ca                                           | 12                 | 54.5               | 8                  | 36.4               |
| Ca LG                                        | 4                  | 80                 | 0                  | 0                  |
| Ca HG                                        | 8                  | 47.1               | 8                  | 47.1               |
| Peri                                         | n/a                | n/a                | n/a                | n/a                |
| Q1 ≤1.32 μm, Q4>1.5 μm                       |                    |                    |                    |                    |
| <b>Bar graph CK5- cells</b>                  |                    |                    |                    |                    |
| Normal                                       | 2                  | 20                 | 2                  | 20                 |
| PIN                                          | 12                 | 50                 | 2                  | 8.3                |
| PIN LG                                       | 2                  | 22.2               | 1                  | 11.1               |
| PIN HG                                       | 10                 | 66.7               | 1                  | 6.7                |
| Ca                                           | 30                 | 40.5               | 13                 | 17.6               |
| Ca LG                                        | 19                 | 54.3               | 5                  | 14.3               |
| Ca HG                                        | 11                 | 28.2               | 8                  | 20.5               |
| Peri                                         | 9                  | 64.3               | 2                  | 14.3               |
| Q1 ≤0.87 μm, Q4 >1.4 μm                      |                    |                    |                    |                    |
| <b>Bar graph stromal cells</b>               |                    |                    |                    |                    |
|                                              | Q1 n<br>(patients) | Q1 %<br>(patients) | Q4 n<br>(patients) | Q4 %<br>(patients) |
| Normal                                       | 2                  | 20                 | 2                  | 20                 |
| PIN                                          | 15                 | 62.5               | 2                  | 8.3                |
| PIN LG                                       | 4                  | 44.4               | 1                  | 11.1               |
| PIN HG                                       | 11                 | 73.3               | 1                  | 6.7                |
| Ca                                           | 43                 | 61.4               | 4                  | 5.7                |
| Ca LG                                        | 18                 | 54.5               | 1                  | 3.0                |
| Ca HG                                        | 25                 | 67.6               | 3                  | 8.1                |
| Peri                                         | 5                  | 83.3               | 0                  | 0                  |
| Q1 ≤1.04 μm, Q4 >1.54 μm                     |                    |                    |                    |                    |
