# Supplementary material for: Primary Cilia Are Lost in Preinvasive and Invasive Prostate Cancer
Source: PubMed Central journal article supplement (PMC3699526; doi:10.1371/journal.pone.0068521), 2013-07-02
Supplement: pone.0068521.s011.pdf [file pone.0068521.s011.pdf]

**Table S5A: Values for quantitation of percent ciliated epithelial/cancer and stromal cells in normal, normal adjacent to cancer, and BPH.**

| <b>Boxplot epithelial/cancer cells</b> |              |                |                  |                      |                     |         |
|----------------------------------------|--------------|----------------|------------------|----------------------|---------------------|---------|
|                                        | n (patients) | % cilia median | n (total nuclei) | Range nuclei/patient | Range cilia/patient | P-value |
| Normal                                 | 10           | 8.9            | 6517             | 405-1097             | 25-95               | n/a     |
| Normal adj. ca                         | 16           | 11.1           | 7491             | 92-1085              | 9-136               | 0.257   |
| BPH                                    | 8            | 10.4           | 5750             | 180-1833             | 9-156               | 0.231   |
| Average                                | 11           | 10.1           | 6586             | 67-1338              | 14-129              |         |
| <b>Boxplot CK5+ cells</b>              |              |                |                  |                      |                     |         |
| Normal                                 | 10           | 28.8           | 1624             | 58-418               | 20-85               | n/a     |
| Normal adj. ca                         | 16           | 31.3           | 2033             | 29-382               | 7-118               | 0.858   |
| BPH                                    | 8            | 27.1           | 1175             | 14-380               | 5-55                | 0.349   |
| Average                                | 11           | 29.1           | 1611             | 34-393               | 11-86               |         |
| <b>Boxplot CK5- cells</b>              |              |                |                  |                      |                     |         |
| Normal                                 | 10           | 2.9            | 4893             | 270-726              | 3-33                | n/a     |
| Normal adj. ca                         | 16           | 3.5            | 5458             | 63-703               | 2-44                | 0.130   |
| BPH                                    | 8            | 6.1            | 4575             | 166-1453             | 4-102               | 0.08    |
| Average                                | 11           | 4.1            | 4975             | 166-961              | 3-60                |         |
| <b>Boxplot Stromal cells</b>           |              |                |                  |                      |                     |         |
| Normal                                 | 10           | 5.9            | 2625             | 170-424              | 3-52                | n/a     |
| Normal adj. ca                         | 16           | 8.0            | 3206             | 67-459               | 6-36                | 0.152   |
| BPH                                    | 8            | 4.3            | 1716             | 65-427               | 1-23                | 0.125   |
| Average                                | 11           | 6.1            | 2516             | 101-437              | 3-37                |         |

**Table S5B: Values for analysis of percent ciliated epithelial/cancer and stromal cells in normal, normal adjacent to cancer, and BPH.**

| <b>Bar graph epithelial/cancer cells</b> |                |                 |                 |                 |
|------------------------------------------|----------------|-----------------|-----------------|-----------------|
|                                          | Q1 n(patients) | Q1 % (patients) | Q4 n (patients) | Q4 % (patients) |
| Normal                                   | 2              | 20              | 2               | 20              |
| Normal adj. ca                           | 3              | 18.8            | 7               | 43.8            |
| BPH                                      | 3              | 37.5            | 4               | 50              |
| Q1 ≤7.6%, Q4>11.4%                       |                |                 |                 |                 |
| <b>Bar graph CK5+ cells</b>              |                |                 |                 |                 |
| Normal                                   | 2              | 20              | 2               | 20              |
| Normal adj. ca                           | 6              | 37.5            | 6               | 37.5            |
| BPH                                      | 4              | 50              | 2               | 25              |
| Q1 ≤26.9%, Q4>33.6%                      |                |                 |                 |                 |
| <b>Bar graph CK5- cells</b>              |                |                 |                 |                 |
| Normal                                   | 2              | 20              | 2               | 20              |
| Normal adj. ca                           | 1              | 6.3             | 7               | 43.8            |
| BPH                                      | 1              | 12.5            | 5               | 62.5            |
| Q1 ≤1.5%, Q4>4.2%                        |                |                 |                 |                 |
| <b>Bar graph stromal cells</b>           |                |                 |                 |                 |
| Normal                                   | 2              | 20              | 2               | 20              |
| Normal adj. ca                           | 2              | 12.5            | 7               | 43.8            |
| BPH                                      | 4              | 50              | 0               | 0               |
| Q1 ≤4.2%, Q4>8.9%                        |                |                 |                 |                 |
