# Supplementary material for: Primary Cilia Are Lost in Preinvasive and Invasive Prostate Cancer
Source: PubMed Central journal article supplement (PMC3699526; doi:10.1371/journal.pone.0068521), 2013-07-02
Supplement: pone.0068521.s012.pdf [file pone.0068521.s012.pdf]

**Table S6A: Values for quantitation of cilia lengths in normal, normal adjacent to cancer, and BPH.**

| <b>Box plot epithelial/cancer cells</b> |                         |                    |                 |                                 |                                |              |
|-----------------------------------------|-------------------------|--------------------|-----------------|---------------------------------|--------------------------------|--------------|
|                                         | n (patients with cilia) | n (total patients) | n (total cilia) | Median median cilia length (µm) | Range median cilia length (µm) | P-value      |
| Normal                                  | 10                      | 10                 | 592             | 1.30                            | 1.19-1.78                      | n/a          |
| Normal adj. ca                          | 16                      | 16                 | 860             | 1.32                            | 0.49-2.17                      | 0.86         |
| BPH                                     | 8                       | 8                  | 546             | 1.24                            | 0.32-1.92                      | <b>0.048</b> |
| Average                                 | 11                      | 11                 | 666             | 1.29                            | 0.67-1.96                      |              |
| <b>Boxplot CK5+ cells</b>               |                         |                    |                 |                                 |                                |              |
| Normal                                  | 10                      | 10                 | 445             | 1.38                            | 0.77-1.75                      | n/a          |
| Normal adj. ca                          | 16                      | 16                 | 620             | 1.33                            | 0.79-1.71                      | 0.975        |
| BPH                                     | 8                       | 8                  | 265             | 1.08                            | 0.39-1.92                      | 0.274        |
| Average                                 | 11                      | 11                 | 443             | 1.26                            | 0.65-1.79                      |              |
| <b>Boxplot CK5- cells</b>               |                         |                    |                 |                                 |                                |              |
| Normal                                  | 10                      | 10                 | 147             | 1.2                             | 0.69-2.1                       | n/a          |
| Normal adj. ca                          | 16                      | 16                 | 240             | 1.08                            | 0.49-2.17                      | 0.79         |
| BPH                                     | 8                       | 8                  | 281             | 1.0                             | 0.32-1.2                       | 0.29         |
| Average                                 | 11                      | 11                 | 223             | 1.09                            | 0.5-1.82                       |              |
| <b>Boxplot Stromal cells</b>            |                         |                    |                 |                                 |                                |              |
| Normal                                  | 10                      | 10                 | 178             | 1.16                            | 0.71-1.66                      | n/a          |
| Normal adj. ca                          | 16                      | 16                 | 249             | 0.97                            | 0.74-1.92                      | 0.596        |
| BPH                                     | 8                       | 8                  | 64              | 0.98                            | 0.36-1.46                      | 0.779        |
| Average                                 | 11                      | 11                 | 164             | 1.04                            | 0.6-1.68                       |              |

**Table S6B: Values for analysis of cilia lengths in normal, normal adjacent to cancer, and BPH.**

| <b>Bar graph epithelial/cancer cells</b> |                 |                 |                 |                 |
|------------------------------------------|-----------------|-----------------|-----------------|-----------------|
|                                          | Q1 n (patients) | Q1 % (patients) | Q4 n (patients) | Q4 % (patients) |
| Normal                                   | 2               | 20              | 2               | 20              |
| Normal adj. ca                           | 5               | 31.3            | 1               | 6.3             |
| BPH                                      | 4               | 50              | 0               | 0               |
| Q1 ≤1.23µm, Q4 >1.7µm                    |                 |                 |                 |                 |
| <b>Bar graph CK5+ cells</b>              |                 |                 |                 |                 |
| Normal                                   | 2               | 20              | 2               | 20              |
| Normal adj. ca                           | 8               | 50              | 4               | 25              |
| BPH                                      | 6               | 75              | 1               | 12.5            |
| Q1 ≤1.32 µm, Q4>1.5 µm                   |                 |                 |                 |                 |
| <b>Bar graph CK5- cells</b>              |                 |                 |                 |                 |
| Normal                                   | 2               | 20              | 2               | 20              |
| Normal adj. ca                           | 5               | 31.3            | 3               | 18.8            |
| BPH                                      | 2               | 25              | 0               | 0               |
| Q1 ≤0.87 µm, Q4 >1.4 µm                  |                 |                 |                 |                 |
| <b>Bar graph stromal cells</b>           |                 |                 |                 |                 |
| Normal                                   | 2               | 20              | 2               | 20              |
| Normal adj. ca                           | 11              | 68.8            | 2               | 12.5            |
| BPH                                      | 6               | 75              | 0               | 0               |
| Q1 ≤1.04 µm, Q4 >1.54 µm                 |                 |                 |                 |                 |
