# Supplementary material for: Primary Cilia Are Lost in Preinvasive and Invasive Prostate Cancer
Source: PubMed Central journal article supplement (PMC3699526; doi:10.1371/journal.pone.0068521), 2013-07-02
Supplement: pone.0068521.s013.pdf [file pone.0068521.s013.pdf]

**Table S7: Statistically significant correlation between patient characteristics and high or moderate/low nuclear  $\beta$ -catenin in cancers.**

|                                               | $\leq 75$ th percentile of nuclear $\beta$ -catenin of normal basal cells | $> 75$ th percentile of nuclear $\beta$ -catenin of normal basal cells | P-value           |
|-----------------------------------------------|---------------------------------------------------------------------------|------------------------------------------------------------------------|-------------------|
| <b>% patients with capsular penetration</b>   | 2.6                                                                       | 40                                                                     | <b>&lt;0.0001</b> |
| <b>% patients with biochemical recurrence</b> | 68.4                                                                      | 20                                                                     | <b>0.001</b>      |
| <b>Total n (patients)</b>                     | 38                                                                        | 15                                                                     |                   |
