# Supplementary material for: Primary Cilia Are Lost in Preinvasive and Invasive Prostate Cancer
Source: PubMed Central journal article supplement (PMC3699526; doi:10.1371/journal.pone.0068521), 2013-07-02
Supplement: pone.0068521.s014.pdf [file pone.0068521.s014.pdf]

**Table S8: Correlation between patient characteristics and percent cilia in all epithelial cells in normal adjacent to cancer.**

| <b>Patient Characteristics</b>   | <b>P-value</b>                                     | <b><math>\beta</math></b> | <b>95% Confidence Interval</b> |
|----------------------------------|----------------------------------------------------|---------------------------|--------------------------------|
| Age                              | 0.604                                              | -0.005                    | (-0.028, 0.017)                |
| Tumor stage                      | 0.834                                              | 0.028                     | (-0.257,0.314)                 |
| Capsular penetration             | 0.989                                              | -0.002                    | (-0.396, 0.391)                |
| Biochemical recurrence           | 0.671                                              | 0.069                     | (-0.271, 0.409)                |
| Months to biochemical recurrence | Insufficient data<br>Regression model does not fit | -                         | -                              |
| Tumor size of largest tumor      | 0.209                                              | -0.004                    | (-0.011, 0.003)                |
| Pre-operative free PSA           | 0.087                                              | -0.036                    | (-0.079,0.006)                 |
