# Supplementary material for: Primary Cilia Are Lost in Preinvasive and Invasive Prostate Cancer
Source: PubMed Central journal article supplement (PMC3699526; doi:10.1371/journal.pone.0068521), 2013-07-02
Supplement: pone.0068521.s015.pdf [file pone.0068521.s015.pdf]

**Table S9: Correlation between patient characteristics and percent cilia in CK5+ epithelial cells in normal adjacent to cancer.**

| <b>Patient Characteristics</b>   | <b>P-value</b>                                     | <b><math>\beta</math></b> | <b>95% Confidence Interval</b> |
|----------------------------------|----------------------------------------------------|---------------------------|--------------------------------|
| Age                              | 0.725                                              | 0.004                     | (-0.022,0.031)                 |
| Tumor stage                      | <b>0.037</b>                                       | 0.22                      | (0.016,0.437)                  |
| Capsular penetration             | 0.134                                              | 0.25                      | (-0.085, 0.582)                |
| Biochemical recurrence           | <b>0.04</b>                                        | 0.26                      | (0.013, 0.501)                 |
| Months to biochemical recurrence | Insufficient data<br>Regression model does not fit | -                         | -                              |
| Tumor size of largest tumor      | 0.309                                              | 0.004                     | (-0.004, 0.013)                |
| Pre-operative free PSA           | 0.747                                              | 0.010                     | (-0.055,0.075)                 |
