# Supplementary material for: Primary Cilia Are Lost in Preinvasive and Invasive Prostate Cancer
Source: PubMed Central journal article supplement (PMC3699526; doi:10.1371/journal.pone.0068521), 2013-07-02
Supplement: pone.0068521.s017.pdf [file pone.0068521.s017.pdf]

**Table S11: Correlation between patient characteristics and percent cilia in CK5+ PIN cells.**

| <b>Patient Characteristics</b>   | <b>P-value</b>                                     | <b><math>\beta</math></b> | <b>95% Confidence Interval</b> |
|----------------------------------|----------------------------------------------------|---------------------------|--------------------------------|
| Age                              | 0.332                                              | 0.008                     | (-0.009, 0.025)                |
| Tumor stage                      | 0.06                                               | -0.21                     | (-0.423, 0.006)                |
| Capsular penetration             | 0.06                                               | -0.24                     | (-0.500, 0.008)                |
| Biochemical recurrence           | 0.10                                               | -0.51                     | (-1.12, 0.109)                 |
| Months to biochemical recurrence | Insufficient data<br>Regression model does not fit | -                         | -                              |
| Tumor size of largest tumor      | <b>0.006</b>                                       | -0.016                    | (-0.027, -0.005)               |
| Pre-operative free PSA           | 0.552                                              | -0.012                    | (-0.055, 0.030)                |
