# Supplementary material for: Primary Cilia Are Lost in Preinvasive and Invasive Prostate Cancer
Source: PubMed Central journal article supplement (PMC3699526; doi:10.1371/journal.pone.0068521), 2013-07-02
Supplement: pone.0068521.s018.pdf [file pone.0068521.s018.pdf]

**Table S12: Correlation between patient characteristics and percent cilia in all cancer cells in prostate cancers.**

| <b>Patient Characteristics</b>   | <b>P-value</b> | <b><math>\beta</math></b> | <b>95% Confidence Interval</b> |
|----------------------------------|----------------|---------------------------|--------------------------------|
| Age                              | 0.943          | 0.001                     | (-0.028, 0.030)                |
| Tumor stage                      | 0.651          | -0.097                    | (-0.527,0.331)                 |
| Capsular penetration             | 0.816          | -0.068                    | (-0.652, 0.515)                |
| Biochemical recurrence           | 0.932          | 0.018                     | (-0.404, 0.440)                |
| Months to biochemical recurrence | 0.958          | -0.0001                   | (-0.006,0.006)                 |
| Tumor size of largest tumor      | 0.317          | -0.013                    | (-0.038,0.013)                 |
| Pre-operative free PSA           | 0.333          | -0.003                    | (-0.011,0.003)                 |
