# Supplementary material for: Primary Cilia Are Lost in Preinvasive and Invasive Prostate Cancer
Source: PLOS journal article supplement (doi:10.1371/journal.pone.0068521), 2013-07-02
Supplement: S16 (10.1371/journal.pone.0068521.s016) [file journal.pone.0068521.s016]

**Table S10: Correlation between patient characteristics and percent cilia in CK5- epithelial cells in normal adjacent to cancer.**

| <b>Patient Characteristics</b>   | <b>P-value</b>                                     | <b><math>\beta</math></b> | <b>95% Confidence Interval</b> |
|----------------------------------|----------------------------------------------------|---------------------------|--------------------------------|
| Age                              | 0.369                                              | -0.016                    | (-0.022,0.031)                 |
| Tumor stage                      | 0.432                                              | -0.17                     | (0.616,0.277)                  |
| Capsular penetration             | 0.369                                              | -0.25                     | (-0.837, 0.329)                |
| Biochemical recurrence           | 0.661                                              | -0.012                    | (-0.683, 0.446)                |
| Months to biochemical recurrence | Insufficient data<br>Regression model does not fit | -                         | -                              |
| Tumor size of largest tumor      | <b>0.015</b>                                       | -0.013                    | (-0.022, -0.027)               |
| Pre-operative free PSA           | <b>0.002</b>                                       | -0.083                    | (-0.130,-0.035)                |
